# Supplementary material
Source: PubMed Central journal article supplement (PMC3347179)
Supplement: supp_194.10.2658_FigS1-S4.pdf [file supp_194.10.2658_FigS1-S4.pdf]

## Supporting information

### Appendix S1

#### The inhibitory-effect of dM $\beta$ CD on the anti-*H. pylori* action of progesterones

##### Materials and Methods

Progesterone (PS) and its synthetic derivative, 17 $\alpha$ -hydroxyprogesterone caproate (17 $\alpha$ PSCE), were dissolved in dimethyl sulfoxide (DMSO), and added into PPLO broth (3 ml) at concentrations of 50 and 10  $\mu$ M, respectively. The 0.1% concentration of DMSO used in the experiments did not affect the viability of *H. pylori*. The *H. pylori* ( $10^{5.3}$  CFU/ml) was cultured for 24 h in the presence or absence of dM $\beta$ CD at concentrations of 0.03 and 0.3 mM using the PPLO broth containing either PS (50  $\mu$ M) or 17 $\alpha$ PSCE (10  $\mu$ M), with continuous shaking under microaerobic conditions in the dark. Upon completion of the cultures, the CFUs were determined by the conventional method (Hosoda et al., 2011). The results are indicated as the mean CFU  $\pm$  SD obtained from three independent experiments.

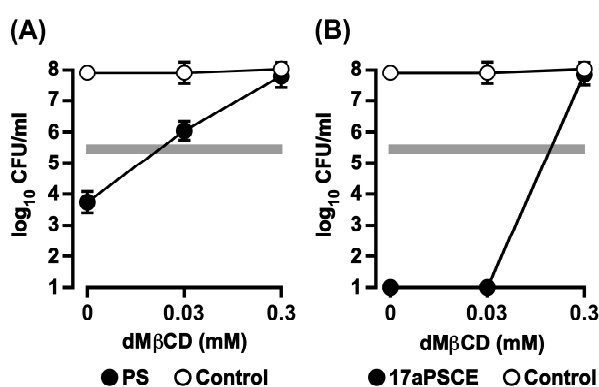

Fig. S1. Inhibitory effect of dM $\beta$ CD on the anti-*H. pylori* actions of PS and 17 $\alpha$ PSCE

The gray belts in the graphs indicate the baseline CFUs before the cultures.

## Results

The anti-*H. pylori* action of PS (50  $\mu$ M) was inhibited by dM $\beta$ CD: the CFUs were higher than the pre-culture baseline CFU ( $10^{5.3}$  CFU/ml) when *H. pylori* was cultured in the presence of 0.03 mM dM $\beta$ CD and lower than the baseline CFU when *H. pylori* was cultured in the absence of dM $\beta$ CD (Fig. S1A). In addition, the anti-*H. pylori* actions of PS (50  $\mu$ M) and 17 $\alpha$ PSCE (10  $\mu$ M) were completely inhibited in the *H. pylori* cultured in the presence of 0.3 mM dM $\beta$ CD: the CFUs at that time were comparable to the control CFU ( $10^8$  CFU/ml) of the *H. pylori* cultured without PS or 17 $\alpha$ PSCE (Fig. S1A and B). These results indicate that dM $\beta$ CD somehow prevents *H. pylori* cells from interacting with PS or 17 $\alpha$ PSCE.

## Appendix S2

### Determination of dM $\beta$ CD concentrations necessary to dissociate cholesterols and 3 $\beta$ -OH steroids from paper disks

#### Materials and Methods

The dM $\beta$ CD concentration used in this study was determined by the following experiment. FC (100 nmol) dissolved in chloroform (20  $\mu$ l) was dotted onto paper disks (8 mm diameter, 1 mm thickness) from Tokyo Roshi Kaisha Ltd. (Tokyo, Japan). After vaporization of the chloroform solvent, each FC-dotted paper disk was soaked in a 50 mM Tris (pH 7.5) buffer (2 ml) in a single well of a 12-well cell culture plate (Sumitomo Bakelite Co., Ltd., Tokyo, Japan) and incubated with dM $\beta$ CD at 25 $^{\circ}$ C for

4 h, with shaking (100 rpm/min). The FC-dotted paper disks incubated with dM $\beta$ CD at concentrations from 1 to 5 mM were then washed 6 times with distilled water (100 rpm/min, 10 min), dried with a centrifugal concentrator (Tomy Seiko Co., Ltd., Tokyo, Japan), and soaked in acetic acid (600  $\mu$ l) to elute the FC remaining in the paper disk. A ferrous chloride-sulfuric acid reagent [phosphoric acid-sulfuric acid (2:25) solution containing 0.2% FeCl<sub>2</sub>-6H<sub>2</sub>O] (400  $\mu$ l) was added into the acetic acid solution and vigorously stirred, and the reaction solution was incubated for 15 min at room temperature. After color reaction and cooling, the absorbance of acetic acid solution (200  $\mu$ l) with ferrous chloride-sulfuric acid reagent was measured using a Versa max microplate reader (Molecular Devices Co, CA) at a wavelength of A<sub>550 nm</sub>. The FC remaining in the paper disk was quantified based on a regression line (y axis, A<sub>550 nm</sub>; x axis, FC amount) calculated using FC standard solutions. Results are indicated as the mean FC (nmol)  $\pm$  SD obtained from three independent experiments. The experiments similar to that with FC were conducted on paper disks dotted with a 50 nmol of cholesterol ester (cholesterol hexanoate: CE), and with a 100 nmol of pregnenolone (PN) or dehydroepiandrosterone (dEA). After the measurement of A<sub>550 nm</sub>, the CE, PN, and dEA remaining in the paper disks were quantified based on the respective regression lines calculated using the CE, PN, and dEA standard solutions. The results are indicated as the mean CE (nmol)  $\pm$  SD, the mean PN (nmol)  $\pm$  SD, and the mean dEA (nmol)  $\pm$  SD, obtained from three independent experiments.

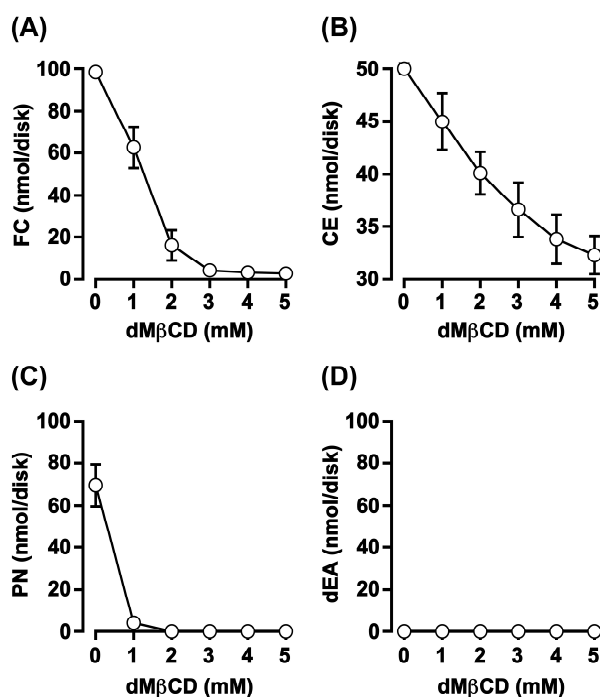

**Fig. S2. Effect of dM $\beta$ CD in eluting FC, CE, PN, and dEA from the paper disks**

## Results

FC was hardly eluted from the paper disk incubated without dM $\beta$ CD: the FC amount (approximately 98 nmol) remaining in the paper disk after incubation was comparable to the FC amount (100 nmol) dotted onto the paper disk before the incubation. FC was efficiently eluted from the paper disks incubated in the presence of dM $\beta$ CD, especially at the higher dM $\beta$ CD concentrations: the FC amount remaining in the paper disk incubated in the presence of 5 mM dM $\beta$ CD concentration was below the detection limits. This indicates that FC dissociates from the paper disk by forming an inclusion complex with dM $\beta$ CD, and that the 5 mM dM $\beta$ CD concentration is necessary to elute FC from the paper disk completely (Fig. S2A). In contrast, CE (50 nmol) was eluted from the paper disk incompletely: about 32 nmol of CE was retained in the paper disk even in the presence of the 5 mM

dM $\beta$ CD (Fig. S2B). Approximately 30 nmol of PN was spontaneously dissociated from the paper disk even in the absence of dM $\beta$ CD, and the complete elution of PN (100 nmol) from the paper disk was observed in the presence of dM $\beta$ CD at the concentration of 2 mM (Fig. S2C). Surprisingly, dEA (100 nmol) was completely dissociated from the paper disk even in the absence of dM $\beta$ CD (Fig. S2D). Though the elution of CE from the paper disk was incomplete in the presence of the 5 mM dM $\beta$ CD, approximately 20 nmol CE was barely eluted from the paper disk dotted with a 50 nmol CE in the presence of the 5 mM dM $\beta$ CD, and this dM $\beta$ CD concentration was sufficient to elute the FC (100 nmol) and the 3 $\beta$ -OH steroids, namely PN (100 nmol) and dEA (100 nmol), from the paper disk. On this basis, we decided that the 5 mM dM $\beta$ CD concentration was appropriate for use in this study.

## Appendix S3

### Distribution of dM $\beta$ CD via the chloroform-methanol-water solvent system

#### Materials and Methods

After dM $\beta$ CD (10 nmol) was dissolved in chloroform-methanol (2:1) solvent (800  $\mu$ l), distilled water (160  $\mu$ l) was added into the dM $\beta$ CD solution and vigorously mixed. The water phase and chloroform phase separated via the above-described organic solvent distribution method were recovered as two fractions and dried with a centrifugal concentrator (Tomy Seiko Co., Ltd.). After replacing the solvent with 50 mM Tris (pH 7.5) buffer (100  $\mu$ l), adding a 5% phenol solution (100  $\mu$ l) into each fraction from the water phase and chloroform phase, and mixing vigorously, the color reaction in the phenol mixed-solution was induced by vigorous mixing with a sulfuric acid solution (500  $\mu$ l). After 20 min, the absorbance ( $A_{490\text{ nm}}$ ) of the reaction solution (200  $\mu$ l) was measured at a wavelength of 490 nm (Versa max microplate reader) to quantify the dM $\beta$ CD in each fraction from the water phase and chloroform phase. The amounts of dM $\beta$ CD were calculated based on a dM $\beta$ CD standard curve, and indicated as the mean dM $\beta$ CD (nmol)  $\pm$  SD obtained from three independent experiments. Meanwhile, a thin-layer chromatography (TLC) analysis was performed on the dM $\beta$ CD profiles in fractions of the water phase and chloroform phase. Chloroform-methanol (2:1) solution (40  $\mu$ l) was added into each dried fraction from the water phase and chloroform phase, and dotted onto a silica gel G60 plate (Merck, Darmstadt, Germany). After TLC by the chloroform-methanol-water (70:30:5) solvent system, the silica gel G60 plate was sprayed with a 60% sulfuric acid solution and heated at 180 $^{\circ}$ C to visualize the dM $\beta$ CD spotted on the plate surface.

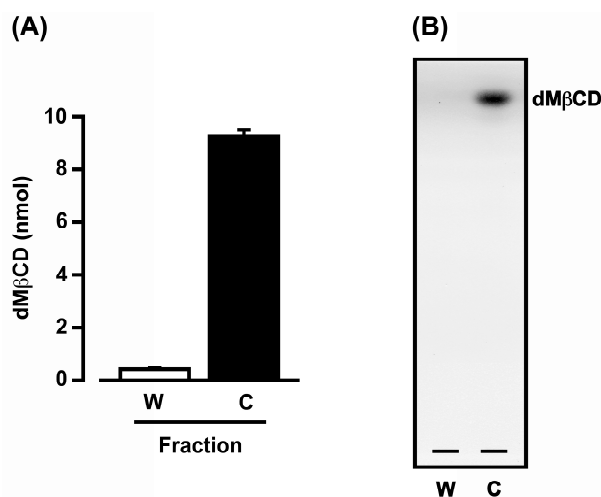

**Fig. S3. Levels of dM $\beta$ CD detected in the water phase and chloroform phase fractions**

W, water phase fraction; C, chloroform phase fraction

## Results

Almost all of the dM $\beta$ CD (about 9.3 nmol) was distributed into the chloroform phase fraction when 10 nmol dM $\beta$ CD was treated with the chloroform-methanol-water (10:5:3) solvent (Fig. S3A). In contrast, the water phase fraction contained only negligible amounts (about 0.4 nmol) of dM $\beta$ CD. In addition, the TLC analysis detected the dM $\beta$ CD spot ( $R_f$ : 0.94) at a high density in the chloroform phase fraction, but not in the water phase fraction (Fig. S3B). These results indicate that dM $\beta$ CD is recovered at the chloroform phase separated via the organic solvent distribution method used in this study.

## Appendix S4

### Binding of the dM $\beta$ CD molecule itself to *H. pylori* PE

#### Materials and Methods

PE (300  $\mu$ g)-fixed paper disks were incubated with FC (100 nmol)-fixed paper disks or FC-free paper disks in the presence of dM $\beta$ CD (5 mM) in a 50 mM Tris (pH 7.5) buffer (2 ml) for 4 h at 25°C, with shaking (100 rpm/min). After the incubations, the dM $\beta$ CD in the PE-fixed paper disks was quantified by the same method described in the section on the “Assay of binding of cholesterols, 3 $\beta$ -OH steroids, and dM $\beta$ CD to PE and PG-CL” in the Materials and Methods. The dM $\beta$ CD amounts were indicated as the mean dM $\beta$ CD (nmol)  $\pm$  SD obtained from three independent experiments.

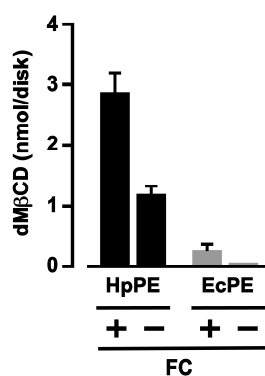

Fig. S4. Binding of the FC-dM $\beta$ CD inclusion complex and dM $\beta$ CD to *H. pylori* PE

## Results

*H. pylori* PE (HpPE) clearly interacted with the dM $\beta$ CD molecule even in the absence of FC, although less dM $\beta$ CD bound to HpPE in the absence of FC than in the presence of FC (Fig. S4). In contrast, *E. coli* PE (EcPE) did not bind dM $\beta$ CD in the absence of FC, and the binding of dM $\beta$ CD to EcPE was negligible even in the presence of FC. These results indicate that *H. pylori* PE has sufficient potency to bind not only FC-dM $\beta$ CD inclusion complex, but also the dM $\beta$ CD molecule, without FC.

## References

Hosoda K, Shimomura H, Hayashi S, Yokota K, Hirai Y. 2011. Steroid hormones as bactericidal agents to *Helicobacter pylori*. FEMS Microbiol. Lett. 318: 68-75.
